# Supplementary material for: Wind-Wave Synergistic Triboelectric Nanogenerator: Performance Evaluation Test and Potential Applications in Offshore Areas
Source: MDPI journal article supplement (doi:10.3390/mi15030314), 2024-02-24
Supplement: s1 [file s1]

# Supporting Information

## Wind-Wave Synergistic Triboelectric Nanogenerator: Performance Evaluation Test and Potential Applications in Offshore Areas

Zhen Pan <sup>1</sup>, Weijian Wu <sup>1</sup>, Jiangtao Zhou <sup>1</sup>, YiLi Hu <sup>1</sup>, Jianping Li <sup>1</sup>, Yingting Wang <sup>1,\*</sup>, Jijie Ma <sup>1, 2,\*</sup> and Jianming Wen <sup>1, 2,\*</sup>

<sup>1</sup> The Institute of Precision Machinery and Smart Structure, College of Engineering, Zhejiang Normal University, Yinbin Street 688, Jinhua, 321004, China

<sup>2</sup> Key Laboratory of Intelligent Operation and Maintenance Technology & Equipment for Urban Rail Transit of Zhejiang Province, Zhejiang Normal University, Yinbin Street 688, Jinhua, 321004, China

\* Correspondence: wangyingting@zjnu.edu.cn, mjj@zjnu.cn, wjming@zjnu.cn

## **Content**

### **Supplemental Figures**

**Figure S1.** Force analysis of the energy storage stage

**Figure S2.** Force analysis of the energy release stage

**Figure S3.** Comparison of output voltage curves under intermittent rotation and continuous rotation

**Figure S4.** Comparison of transferred charge curves under intermittent rotation and continuous rotation

**Figure S5.** Comparison of output current curves under intermittent rotation and continuous rotation

**Figure S6.** The open-circuit voltage of WWS-TENG under the simulated wind-wave superposition excitation with different wind speeds

**Figure S7.** The transferred charge of WWS-TENG under the simulated wind-wave superposition excitation with different wind speeds

**Figure S8.** The short-circuit current of WWS-TENG under the simulated wind-wave superposition excitation with different wind speeds

### **Supplemental Notes**

**Note S1.** The moment balance equation of the energy storage stage

**Note S2.** The moment balance equation of the energy release stage

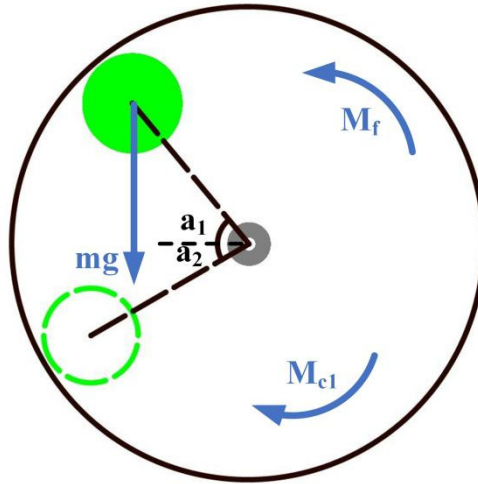

**Figure S1.** Force analysis of the energy storage stage

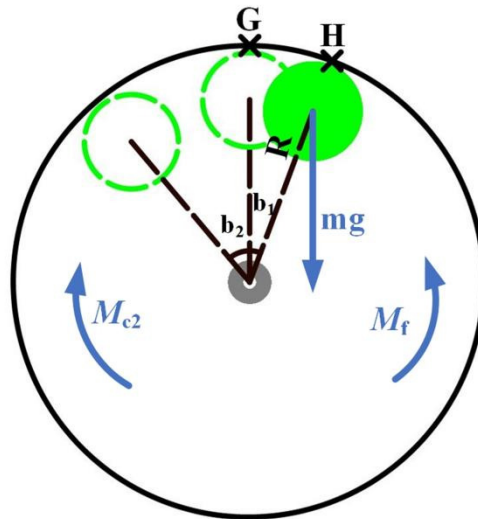

**Figure S2.** Force analysis of the energy release stage

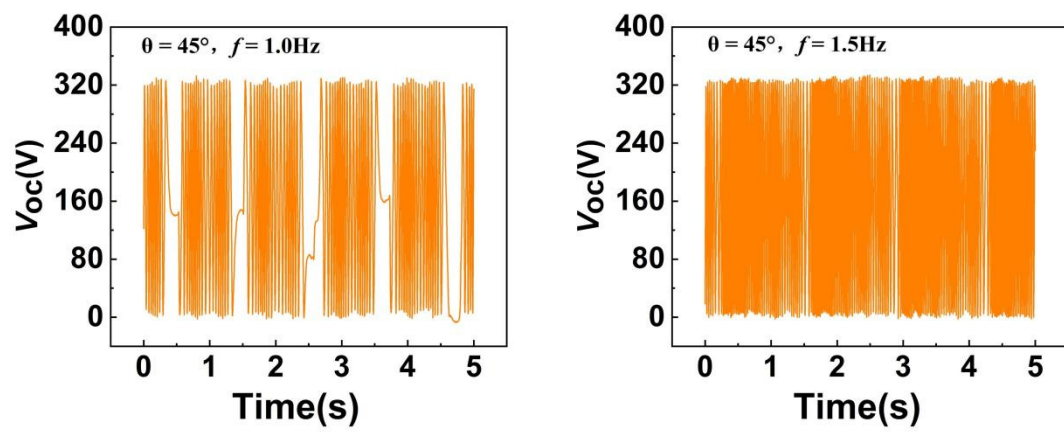

**Figure S3.** Comparison of output voltage curves under intermittent rotation and

continuous rotation

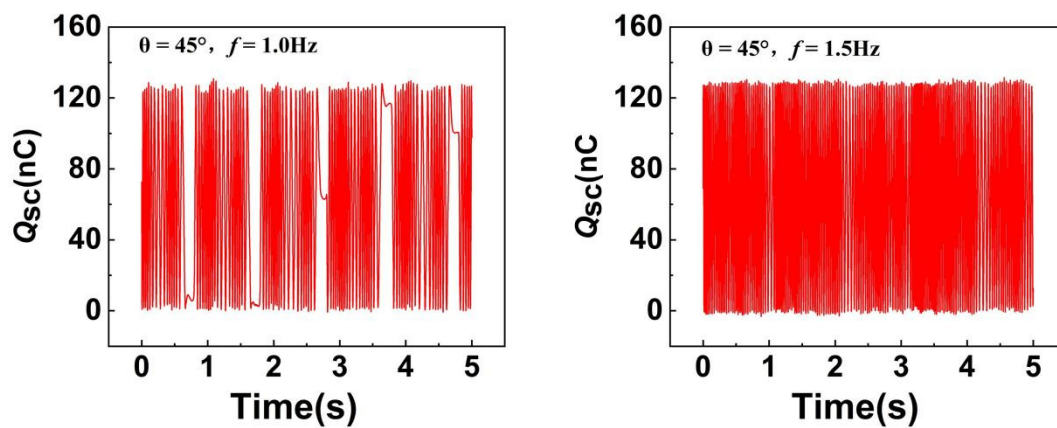

**Figure S4.** Comparison of transferred charge curves under intermittent rotation and continuous rotation

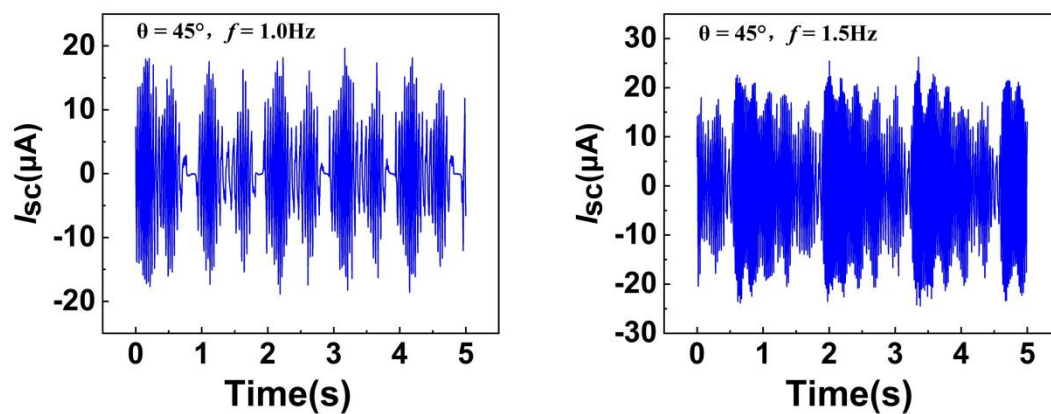

**Figure S5.** Comparison of output current curves under intermittent rotation and continuous rotation

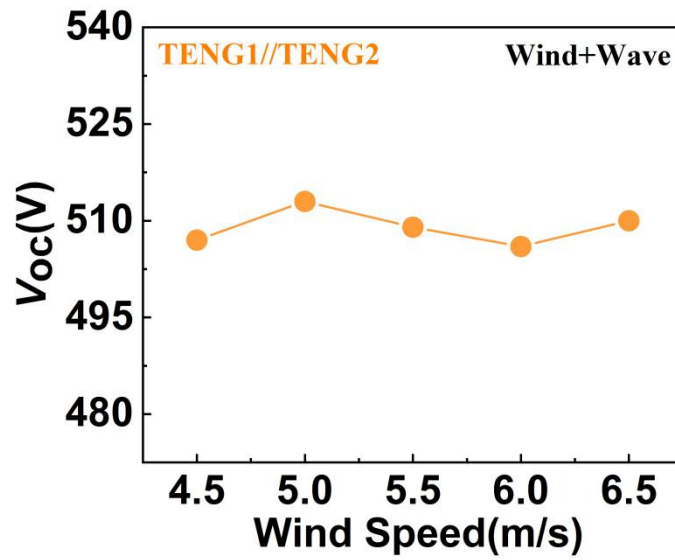

**Figure S6.** The open-circuit voltage of WWS-TENG under the simulated wind-wave superposition excitation with different wind speeds

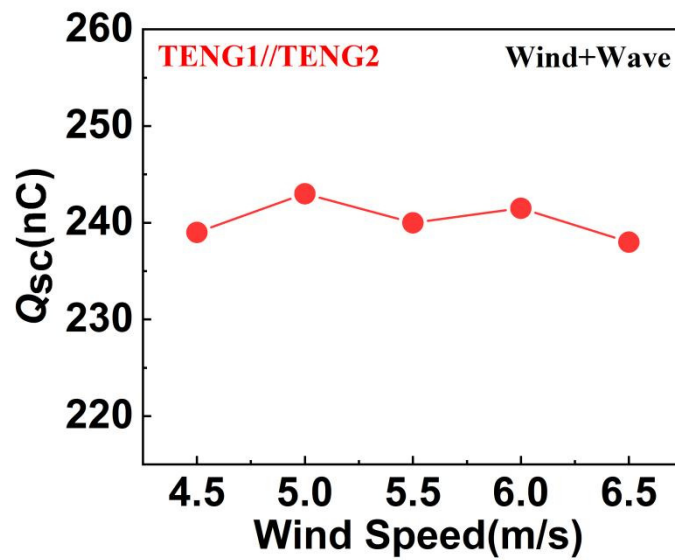

**Figure S7.** The transferred charge of WWS-TENG under the simulated wind-wave superposition excitation with different wind speeds

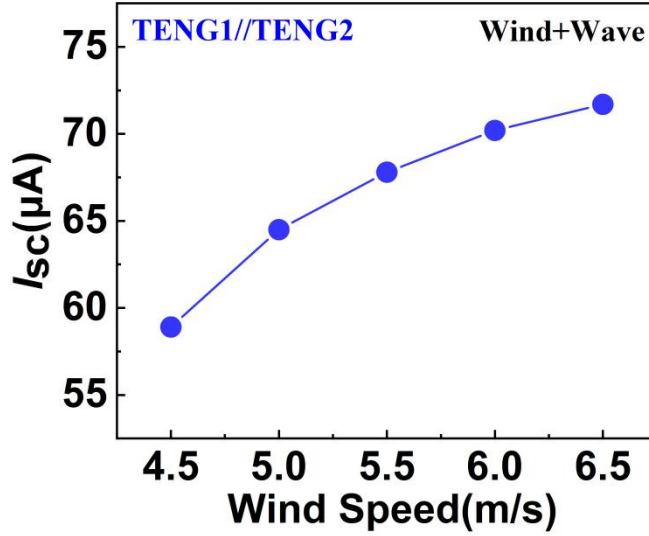

**Figure S8.** The short-circuit current of WWS-TENG under the simulated wind-wave superposition excitation with different wind speeds

**Note S1. The moment balance equation of the energy storage stage**

Based on force analysis in **Figure S1**, the moment balance equation of the center shaft on which the acrylic disc with FEP and mass block is fixed is as follows:

$$J \frac{d^2(a_1 + a_2)}{dt_1^2} = M_{c1} - Rmg\cos a_1 - M_f \quad (S1)$$

Where  $J$  is rotational inertia of the center shaft on which the acrylic disc with FEP and mass block,  $R$  is the distance from the center of rotation to the center of the mass block, the angular displacement of acrylic disc with FEP and mass block is divided into angle  $a_1$  and  $a_2$  by a horizontal line,  $g$  is the gravitational acceleration,  $m$  is the weight of the mass block,  $M_f$  is the moment of friction force on the the acrylic disc with FEP and mass block, and  $M_{c1}$  is the moment acting on this center shaft.

**Note S2. The moment balance equation of the energy release stage**

Based on force analysis in **Figure S2**, the moment balance equation of the center shaft on which the acrylic disc with FEP and mass block is fixed is as follows:

$$J \frac{d^2(b_1 + b_2)}{dt_2^2} = M_{c2} + Rmg\sin b_1 - M_f \quad (S2)$$

Where  $J$ ,  $R$ ,  $g$ ,  $m$  and  $M_f$  are depicted in **Note S1**, the angular displacement of acrylic disc with FEP and mass block is divided into angle  $b_1$  and  $b_2$  by a vertical line,  $M_{c2}$  is the moment acting on this center shaft.
